# Supplementary material
Source: PubMed Central journal article supplement (PMC1257707)

**a****HA1E**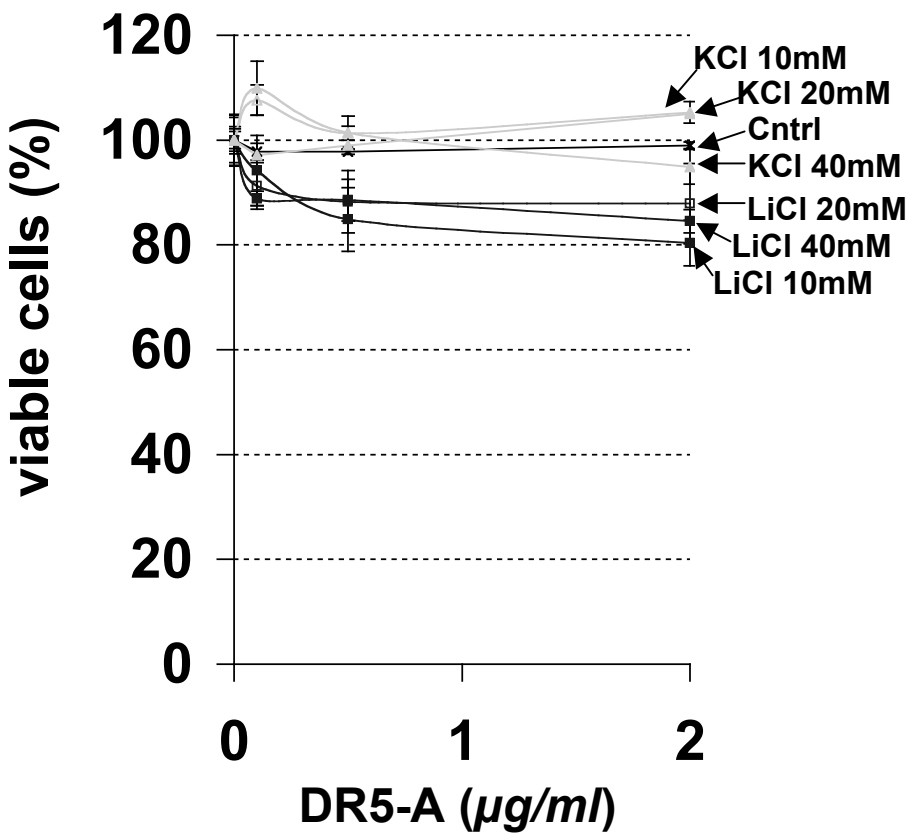**b****HA1E-MYC**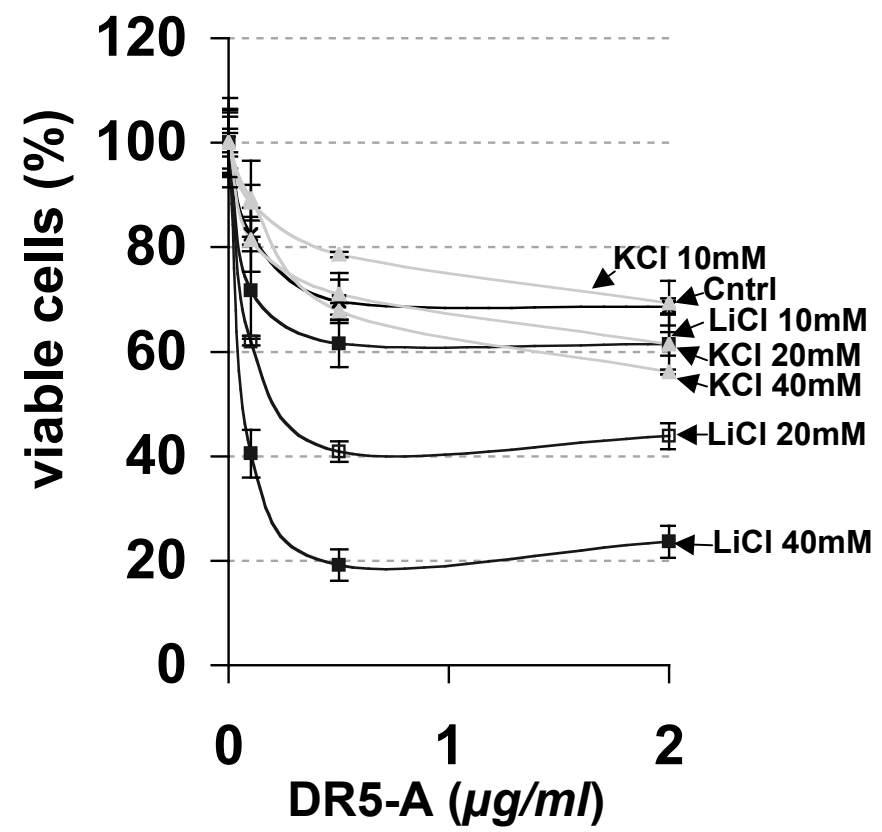

Supplement: pnas_0505114102_1.pdf [file pnas_0505114102_1.pdf]

# a

## HA1E-MYC

6-bromoindirubin-3-oxime

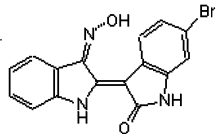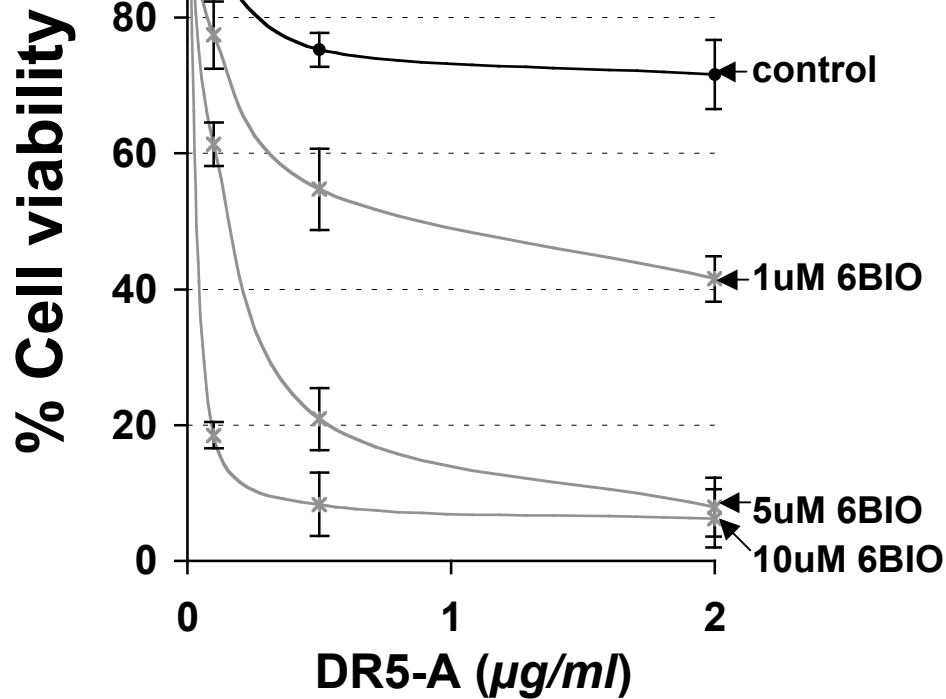

# b

## Comparative MYC levels

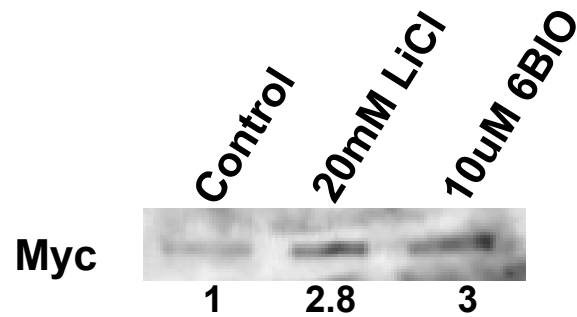

Supplement: pnas_0505114102_2.pdf [file pnas_0505114102_2.pdf]

**a**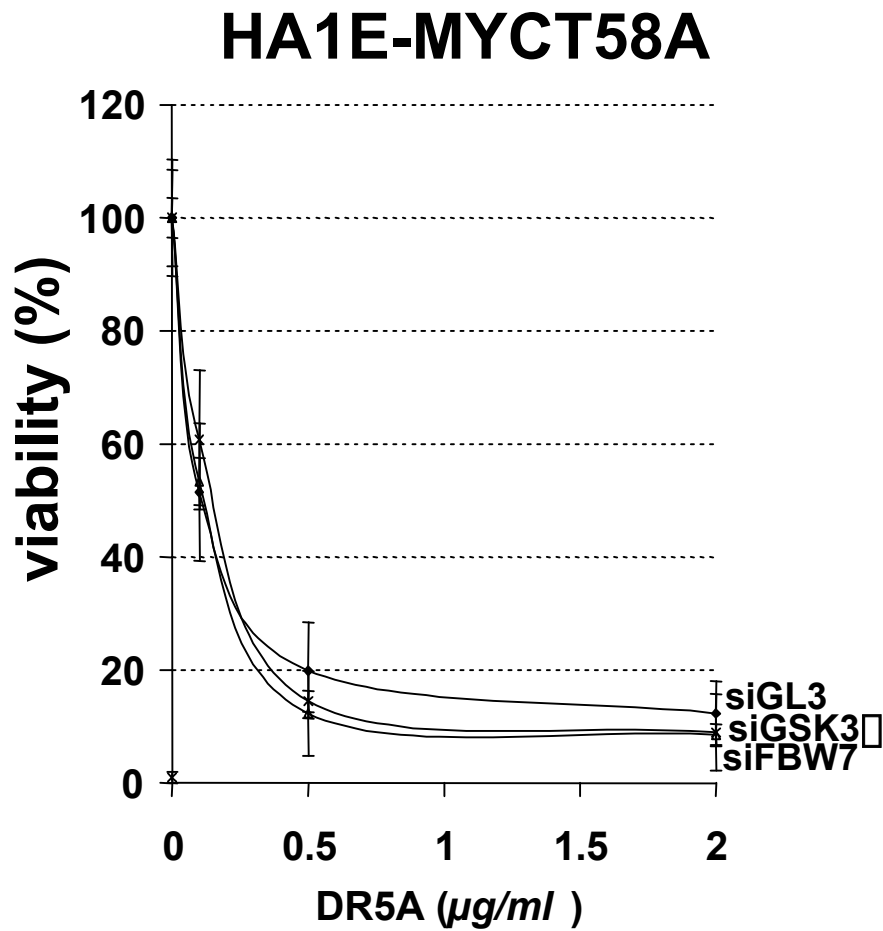**b**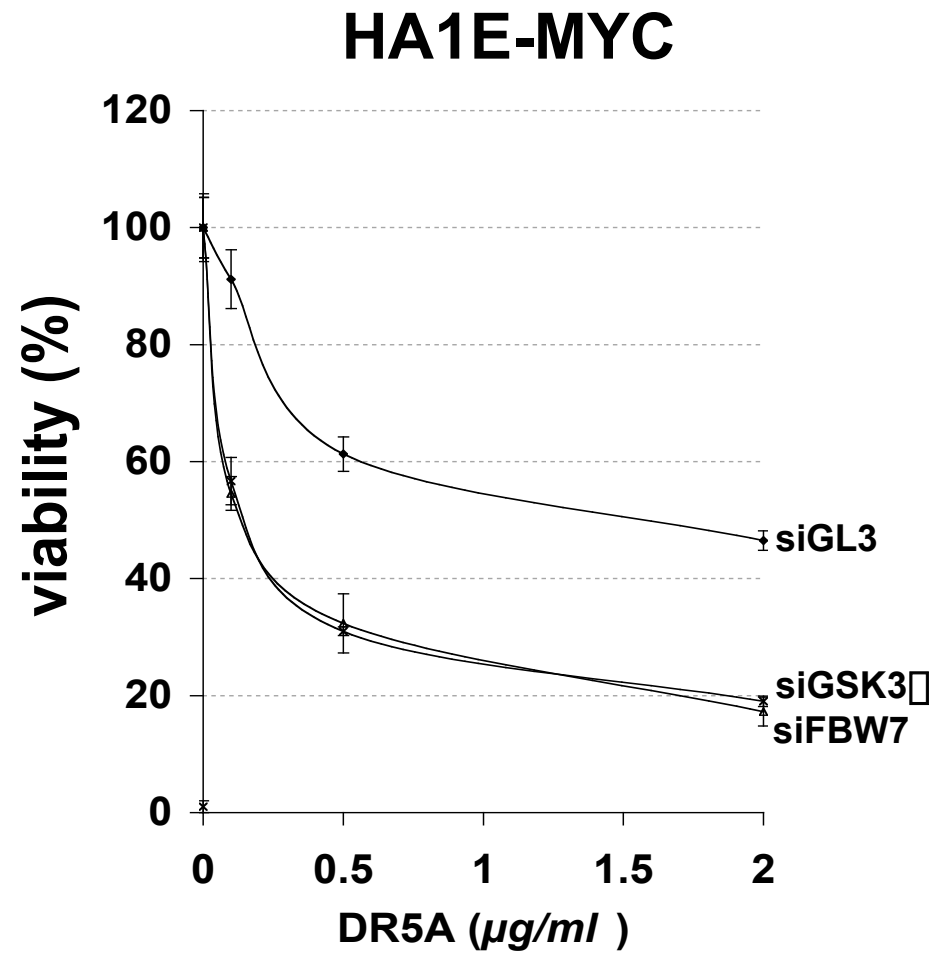

Supplement: pnas_0505114102_3.pdf [file pnas_0505114102_3.pdf]

**a****HCT116 (*FBW7*<sup>+/+</sup>)**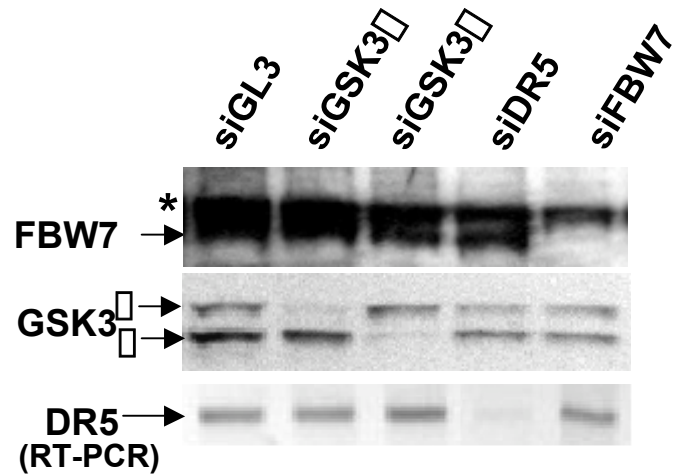**b****HCT116**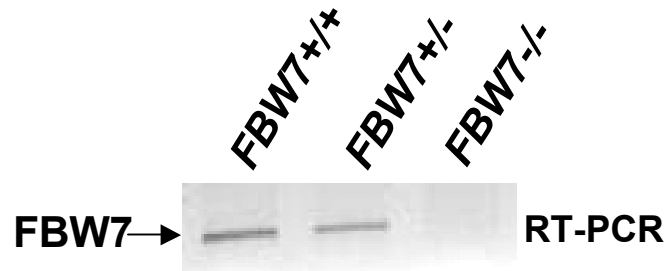

Supplement: pnas_0505114102_4.pdf [file pnas_0505114102_4.pdf]

# HCT116 *FBW7*<sup>-/-</sup>

Viable cells (%)

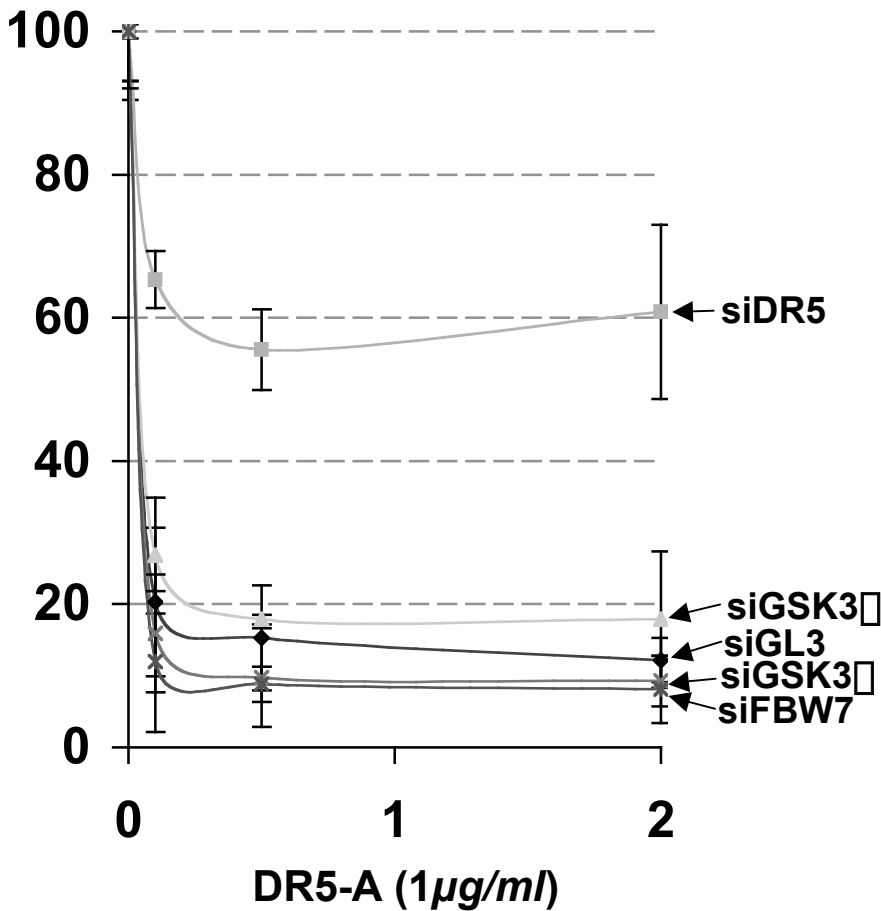

Supplement: pnas_0505114102_5.pdf [file pnas_0505114102_5.pdf]

**a**

# HT115 FBW7 mutation

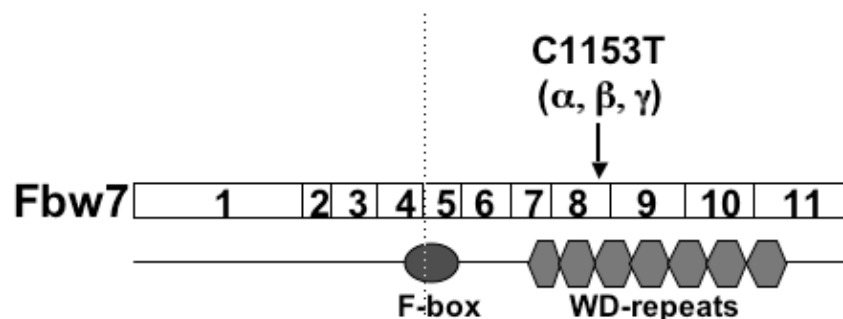**b**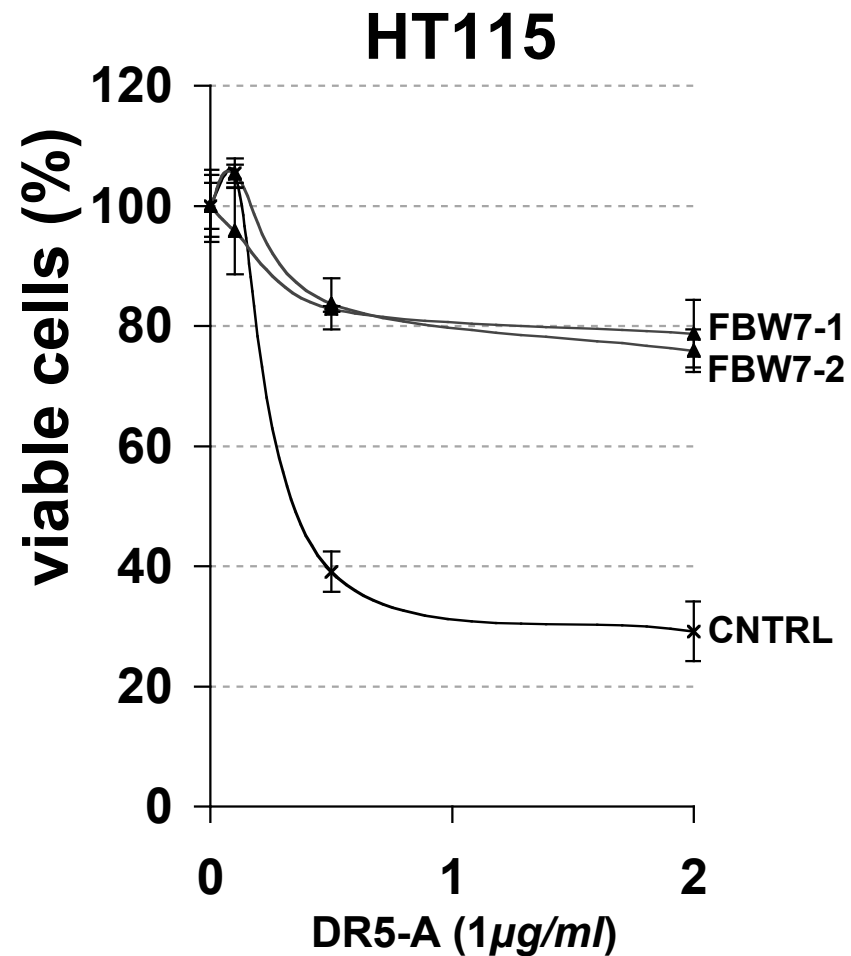

Supplement: pnas_0505114102_6.pdf [file pnas_0505114102_6.pdf]

# HT115

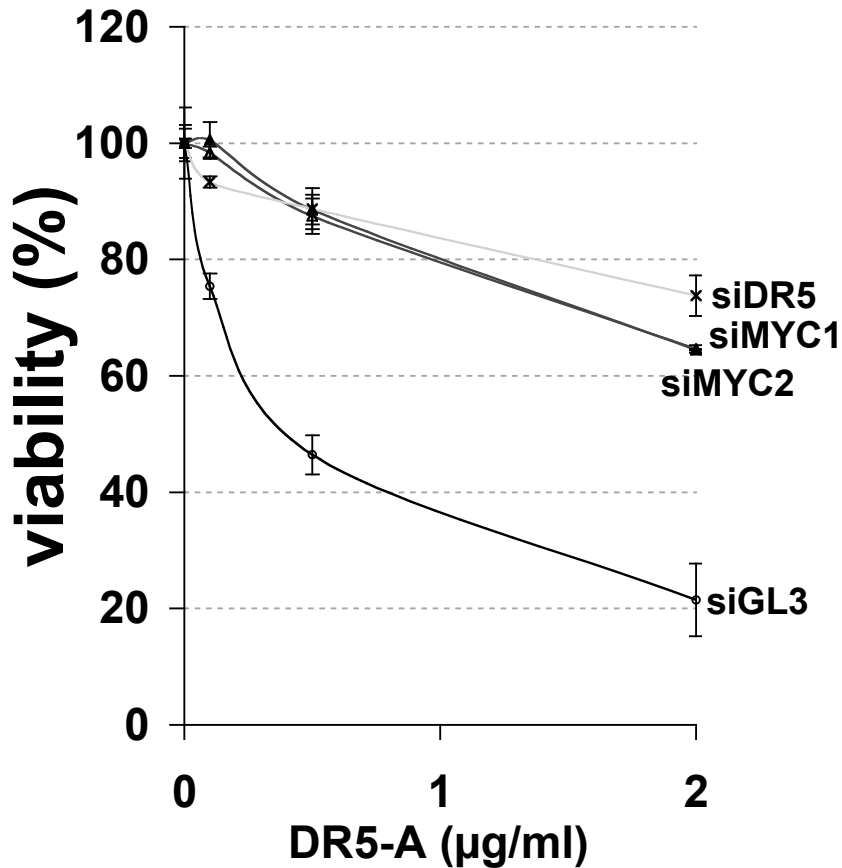

Supplement: pnas_0505114102_7.pdf [file pnas_0505114102_7.pdf]

# HCT116

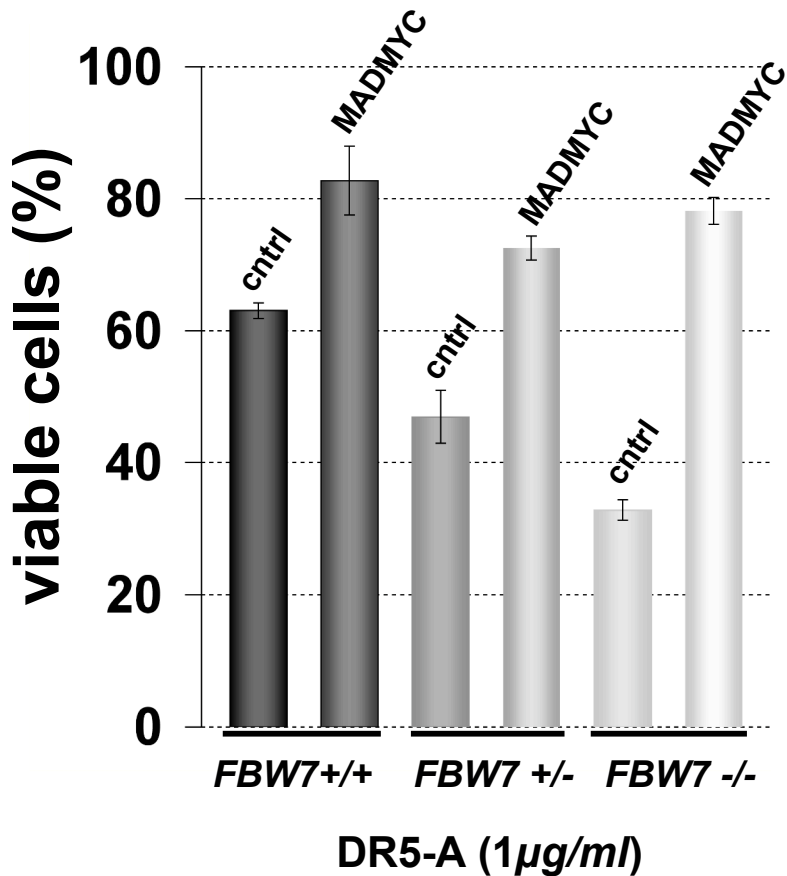

Supplement: pnas_0505114102_8.pdf [file pnas_0505114102_8.pdf]

**a**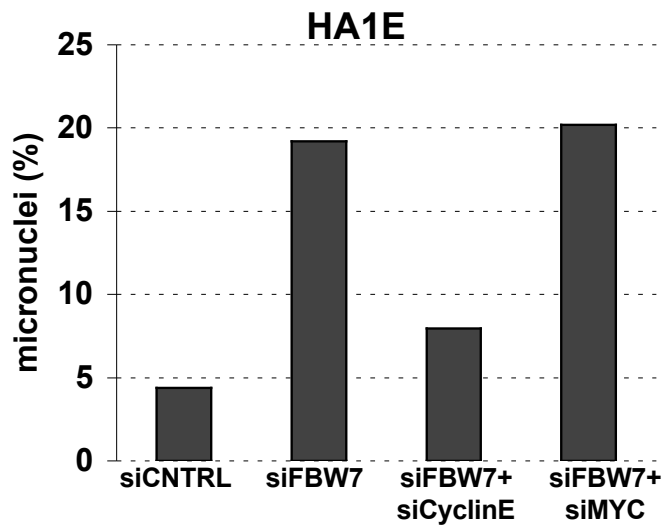**b**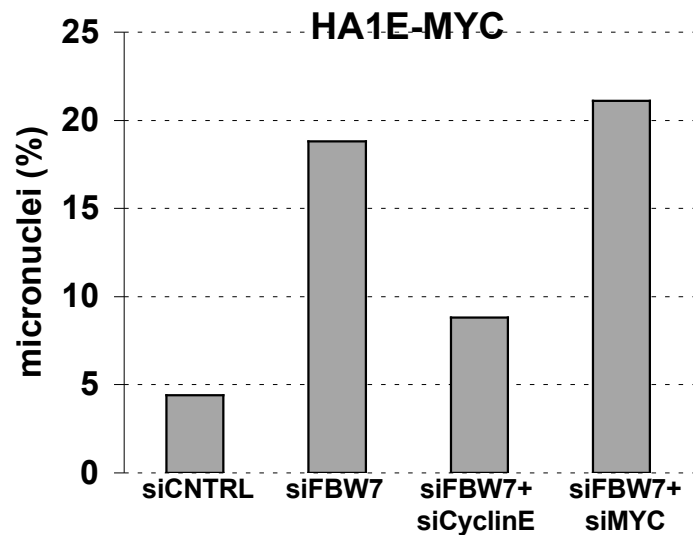**c**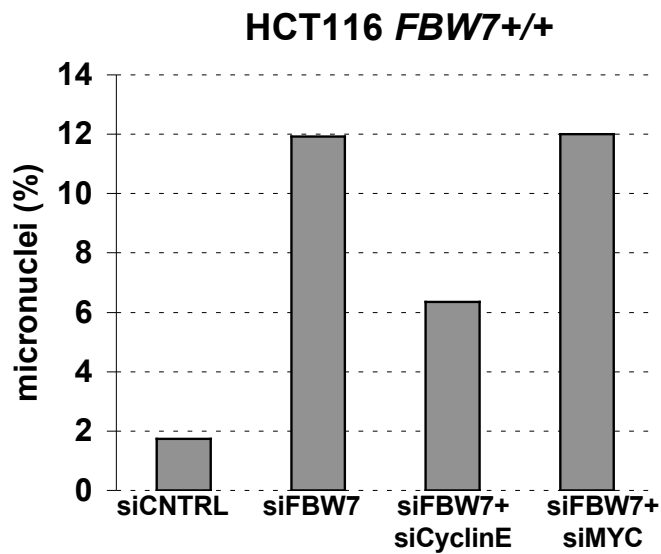**d**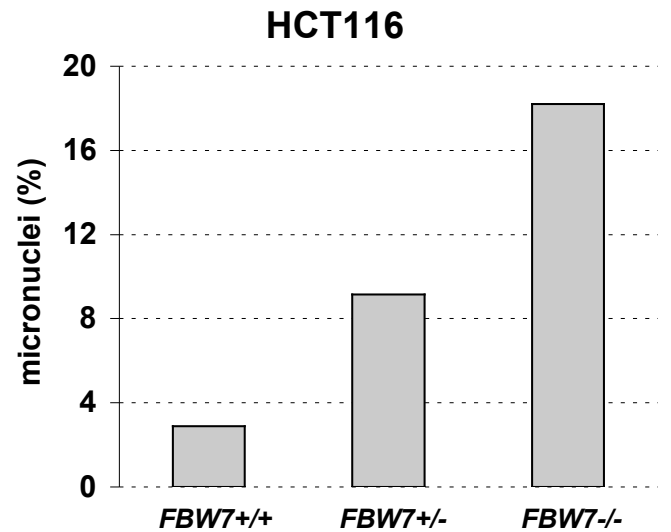

Supplement: pnas_0505114102_9.pdf [file pnas_0505114102_9.pdf]
